# Supplementary material for: Probing the interfacial structure of aqueous surfactants through helium atom evaporation
Source: Royal Society of Chemistry journal article supplement (doi:10.1039/d3fd00177f), 2024-01-01
Supplement: d3fd00177f1.pdf [file d3fd00177f1.pdf]

*Supplementary Information for*

**Probing the Interfacial Structure of Aqueous Surfactants through  
Helium Atom Evaporation**

Xiao-Fei Gao, David J. Hood, Timothy H. Bertram, and Gilbert M. Nathanson\*

Department of Chemistry, University of Wisconsin-Madison,

1101 University Avenue, Madison, WI 53706, USA

\*E-mail: nathanson@chem.wisc.edu

**Table S1: Purities and concentrations of chemicals used in experiments**

**Table S2: Solution surface tensions and microjet parameters**

**Table S3: Fitting parameters for surface tension data and maximum solubilities**

**Table S4: Comparison of surface tension fitting parameters with literature**

**Table S5: Surfactant packing properties at experimental bulk concentrations**

**Fig. S1: Surface tensions of surfactant solutions in water and in 5.1 M LiBr/H<sub>2</sub>O**

**Fig. S2: Comparison of Helium evaporation from 5.1 and 6.7 M LiBr/H<sub>2</sub>O**

**Fig. S3: Comparison of Helium evaporation at 235 and 255 K**

**Discussion of surfactant adsorption in a microjet: Helium evaporation and SF<sub>6</sub> scattering**

**(pages S10 to S14)**

**Fig. S4: Comparison of Helium evaporation from TBA<sup>+</sup>/5.1 M LiBr/H<sub>2</sub>O solution at different**

**TBA<sup>+</sup> concentrations and microjet aging times**

**Fig. S5: SF<sub>6</sub> Scattering from TBA<sup>+</sup>/5.1 M LiBr/H<sub>2</sub>O solution at different TBA<sup>+</sup> concentrations**

**and microjet aging times**

**Table S1. Purities and Concentrations of Chemicals Used in Experiments**

| <b>Chemicals <sup>a</sup></b>                       | <b>Purity</b>                                   |
|-----------------------------------------------------|-------------------------------------------------|
| LiBr salt, 6.0 and 8.0 molal                        | Sigma-Aldrich, ReagentPlus, powder, $\geq 99\%$ |
| decane, pure                                        | Sigma-Aldrich, ReagentPlus, $\geq 99\%$         |
| 1-butanol, 60 mM                                    | Sigma-Aldrich, anhydrous, 98.5%                 |
| 3-methyl-1-butanol, 60 mM                           | Sigma-Aldrich, ACS Reagent, $\geq 98.5\%$       |
| 1-pentanol, 60 mM                                   | Sigma-Aldrich, ACS Reagent, $\geq 98.5\%$       |
| 1-pentanoic acid, 80 and 74 mM                      | Sigma-Aldrich, $\geq 99\%$                      |
| hexyltrimethylammonium bromide, 100 mM              | Sigma-Aldrich, 98%                              |
| dodecyltrimethylammonium bromide, 100 mM            | Sigma-Aldrich, $\geq 98\%$                      |
| tetrabutylammonium bromide, 50 and 150 mM           | Sigma-Aldrich, ACS Reagent, $\geq 98\%$         |
| benzyltrimethylammonium chloride, 250 mM            | Sigma-Aldrich, 97%                              |
| 48% aqueous HBr<br>enough to lower pH of PA to 3    | Sigma-Aldrich, ACS Reagent                      |
| lithium hydroxide<br>enough to raise pH of PA to 12 | Sigma-Aldrich, powder, $\geq 98\%$              |

a. The bulk surfactant concentrations in the 6.0 and 8.0 molal LiBr solutions are accurate to within  $\pm 1$  mM for neutral and  $\pm 2$  mM for ionic solutes.

#### **Physical Properties of the LiBr/H<sub>2</sub>O Solutions**

Molalities: 6.0 and 8.0 moles/kg water (molal unit)

Mole ratios: 0.11 and 0.14 LiBr per H<sub>2</sub>O

Freezing points: 231 and 210 K for 6.0 and 8.0 m LiBr

Densities: 1.29 and 1.46 g/cm<sup>3</sup> for 6.0 and 8 molal at 290 K

Molarities: 5.1 and 6.7 Molar at 290 K

Viscosities: 6 cP at 255 K and 15 cP at 235 K

Surface tension of bare 6.0 and 8.0 molal LiBr at 290 K: 83 mN/m and 85 mN/m

**Table S2. Solution Surface Tension and Microjet Parameters**

| Surfactant solution                                   | $T / K$ | Surface Tension <sup>a</sup><br>mN/m | $u_{\text{jet}}^b$<br>m/s | $L_{\text{breakup}}^c$<br>mm | $P_{\text{vap}}^d$<br>torr | $\lambda^e$<br>$\mu\text{m}$ | $N_{\text{coll}}^f$ |
|-------------------------------------------------------|---------|--------------------------------------|---------------------------|------------------------------|----------------------------|------------------------------|---------------------|
| 5.1 M LiBr/H <sub>2</sub> O                           | 255     | 83                                   | 24                        | 6                            | 0.5                        | 700                          | 0.2                 |
| 60 mM BuOH/5.1 M LiBr/H <sub>2</sub> O                | 255     | 59                                   | 24                        | 7                            | 0.5                        | 700                          | 0.2                 |
| 60 mM MeBuOH/5.1 M LiBr/H <sub>2</sub> O              | 255     | 41                                   | 24                        | 9                            | 0.5                        | 700                          | 0.2                 |
| 60 mM POH/5.1 M LiBr/H <sub>2</sub> O                 | 255     | 39                                   | 24                        | 9                            | 0.5                        | 700                          | 0.2                 |
| 80 mM PA/5.1 M LiBr/H <sub>2</sub> O                  | 255     | 41                                   | 24                        | 9                            | 0.5                        | 700                          | 0.2                 |
| 100 mM HTMA <sup>+</sup> /5.1 M LiBr/H <sub>2</sub> O | 255     | 62                                   | 24                        | 7                            | 0.5                        | 700                          | 0.2                 |
| 100 mM DTMA <sup>+</sup> /5.1 M LiBr/H <sub>2</sub> O | 255     | 30                                   | 24                        | 11                           | 0.5                        | 700                          | 0.2                 |
| 74 mM POO <sup>-</sup> /5.1 M LiBr/H <sub>2</sub> O   | 255     | 67                                   | 24                        | 6                            | 0.5                        | 700                          | 0.2                 |
| 250 mM BTMA <sup>+</sup> /5.1 M LiBr/H <sub>2</sub> O | 255     | 57                                   | 24                        | 7                            | 0.5                        | 700                          | 0.2                 |
| 50 mM TBA <sup>+</sup> /5.1 M LiBr/H <sub>2</sub> O   | 255     | 51                                   | 24                        | 8                            | 0.5                        | 700                          | 0.2                 |
| 150 mM TBA <sup>+</sup> /5.1 M LiBr/H <sub>2</sub> O  | 255     | 49                                   | 24                        | 8                            | 0.5                        | 700                          | 0.2                 |
| 5.1 M LiBr/H <sub>2</sub> O                           | 235     | 83                                   | 16                        | 5                            | 0.2                        | 1600                         | 0.06                |
| 60 mM BuOH/5.1 M LiBr/H <sub>2</sub> O                | 235     | 59                                   | 16                        | 6                            | 0.2                        | 1600                         | 0.07                |
| 60 mM MeBuOH/5.1 M LiBr/H <sub>2</sub> O              | 235     | 41                                   | 16                        | 8                            | 0.2                        | 1600                         | 0.07                |
| 60 mM POH/5.1 M LiBr/H <sub>2</sub> O                 | 235     | 39                                   | 16                        | 8                            | 0.2                        | 1600                         | 0.07                |
| 80 mM PA/5.1 M LiBr/H <sub>2</sub> O                  | 235     | 41                                   | 16                        | 8                            | 0.2                        | 1600                         | 0.07                |
| 250 mM BTMA <sup>+</sup> /5.1 M LiBr/H <sub>2</sub> O | 235     | 57                                   | 16                        | 6                            | 0.2                        | 1600                         | 0.07                |
| 50 mM TBA <sup>+</sup> /5.1 M LiBr/H <sub>2</sub> O   | 235     | 51                                   | 16                        | 7                            | 0.2                        | 1600                         | 0.07                |
| 150 mM TBA <sup>+</sup> /5.1 M LiBr/H <sub>2</sub> O  | 235     | 49                                   | 16                        | 7                            | 0.2                        | 1600                         | 0.07                |

|                                                        |     |    |    |   |      |      |      |
|--------------------------------------------------------|-----|----|----|---|------|------|------|
| 74 mM POO <sup>-</sup> /5.1 M<br>LiBr/H <sub>2</sub> O | 235 | 67 | 16 | 6 | 0.2  | 1600 | 0.07 |
| Decane                                                 | 260 | 24 | 24 | 7 | 0.06 | 2240 | 0.05 |

- a. Surface tensions are measured at 290 K.
- b. Microjet speed, as calculated from the 34  $\mu\text{m}$  nozzle diameter and the mass loss of the solution over a specified time.
- c. See refs. 1 and 2 for calculating the breakup length  $L_{\text{breakup}}$  of the cylindrical jet into droplets. The density of the 5.1 M LiBr/H<sub>2</sub>O is measured to be 1.29 g/cm<sup>3</sup> at 290 K but less than 0.04 g/cm<sup>3</sup> off from the values at 255 and 235 K.<sup>3</sup> The viscosities of 5.1 M LiBr/H<sub>2</sub>O solution are 6 cp and 15 cp at 255 and 235 K, respectively.<sup>3</sup> The density and viscosity of decane are 0.73 g/cm<sup>3</sup> and 1.6 cp at 260 K.<sup>4</sup>
- d. The vapor pressures listed are for 5.1 M LiBr/H<sub>2</sub>O solution without surfactants. The dilute surfactants should have minimal impact on the water vapor pressure, while they may reduce the evaporative water flux slightly because soluble surfactants do not generally pack tightly enough to impose significant barriers to evaporation.<sup>5</sup>
- e. The mean free path  $\lambda$  of collisions between helium atoms and evaporating water molecules is calculated assuming collision cross sections of 15  $\text{\AA}^2$  and 40  $\text{\AA}^2$  for He-Water and He-Decane collisions. See refs. 1 and 2 for calculations.
- f.  $N_{\text{coll}}$  is the average number of collisions that the helium atom undergoes with evaporating water molecules as it exits the jet and passes through the water vapor cloud. See eq 1 of ref. 2.  $N_{\text{coll}}$  is smaller at 235 than at 255 K and is lower than 1 in all cases.

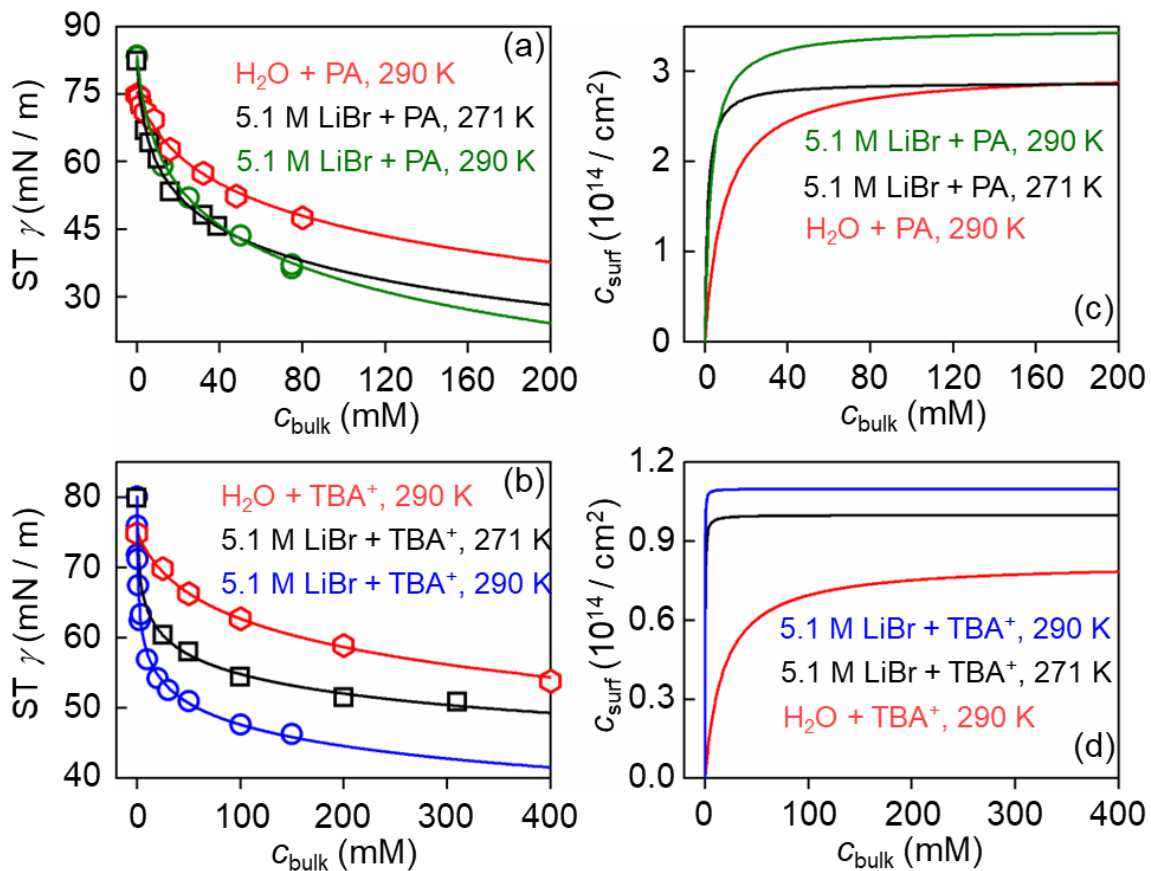

**Fig. S1** (a) Surface tensions (ST)  $\gamma$  of 5.1 M LiBr/H<sub>2</sub>O + pentanoic acid (PA) at 271 K (black squares) and 290 K (green circles), and pure H<sub>2</sub>O + PA (red hexagons) at 290 K as a function of bulk concentration ( $c_{\text{bulk}}$ ) of PA. The solid lines are best-fit curves to the ST data using the three-parameter Szyszkowski equation,<sup>6</sup>  $\gamma = \gamma_0 - c_{\text{max}}RT \ln(1 + K_L c_{\text{bulk}})$ , where  $\gamma_0$ ,  $c_{\text{max}}$ , and  $K_L$  are the surface tension of the solution at  $c_{\text{bulk}} = 0$ , the maximum surface concentration, and the Langmuir constant. (b) Surface tensions of 5.1 M LiBr/H<sub>2</sub>O + tetrabutylammonium (TBA<sup>+</sup>) at 271 K (black squares) and 290 K (blue circles), and H<sub>2</sub>O + TBA<sup>+</sup> (red hexagon) at 290 K as a function of bulk concentration ( $c_{\text{bulk}}$ ) of TBA<sup>+</sup>. The solid lines are best-fit curves to the ST data. The surfactant surface concentrations ( $c_{\text{surf}}$ ) as a function of  $c_{\text{bulk}}$  are shown in (c) and (d), which correspond to (a) and (b), respectively.  $c_{\text{surf}}$  and  $c_{\text{max}}$  are related by the Langmuir equation,

$$c_{\text{surf}} = c_{\text{max}} (K_L c_{\text{bulk}}) / (1 + K_L c_{\text{bulk}}).$$

**Table S3. Fitting parameters for surfactant surface tension data in 5.1 M LiBr/H<sub>2</sub>O<sup>a</sup>**

| Surfactant solution <sup>b</sup>                       | $\gamma_0$ <sup>c</sup><br>(mN/m) | $c_{\max}$ <sup>d</sup><br>( $1 \times 10^{14} / \text{cm}^2$ ) | $K_L$ <sup>d</sup><br>( $\text{M}^{-1}$ )        | $c_{\text{bulk}}(\max)$ <sup>e</sup><br>(mM) at 290 K<br>[240 K] |
|--------------------------------------------------------|-----------------------------------|-----------------------------------------------------------------|--------------------------------------------------|------------------------------------------------------------------|
| <b>5.1 M LiBr/H<sub>2</sub>O + Neutral Surfactants</b> |                                   |                                                                 |                                                  |                                                                  |
| BuOH                                                   | 85 ± 1                            | 3.4 ± 0.2                                                       | 100 ± 20                                         | >120 [>120]                                                      |
| MeBuOH                                                 | 84 ± 1                            | 3.3 ± 0.1                                                       | 420 ± 45                                         | >100 [>100]                                                      |
| POH                                                    | 84 ± 1                            | 3.9 ± 0.2                                                       | 300 ± 36                                         | >300                                                             |
| PA                                                     | 83 ± 1                            | 3.5 ± 0.1                                                       | 350 ± 48                                         | >200 [80]                                                        |
| PA (271 K)                                             | 82 ± 1                            | 2.9 ± 0.2                                                       | 750 ± 160                                        | 120                                                              |
| <b>5.1 M LiBr/H<sub>2</sub>O + ionic Surfactants</b>   |                                   |                                                                 |                                                  |                                                                  |
| HTMA <sup>+</sup>                                      | 82 ± 1                            | 1.3 ± 0.1                                                       | 440 ± 120                                        | 120 [>100]                                                       |
| TBA <sup>+</sup>                                       | 83 ± 1                            | 1.1 ± 0.1                                                       | 21000 ± 5700                                     | >320 [150]                                                       |
| TBA <sup>+</sup> (271 K)                               | 80 ± 1                            | 1.0 ± 0.1                                                       | 5200 ± 2500                                      | 320                                                              |
| BTMA <sup>+</sup>                                      | 84 ± 1                            | 2.8 ± 0.2                                                       | 37 ± 9                                           | >350 [>250]                                                      |
| DTMA <sup>+</sup>                                      | 83 ± 1                            | 2.4 ± 0.3                                                       | 8.1 × 10 <sup>5</sup> ±<br>3.7 × 10 <sup>5</sup> | >300 [>100]                                                      |
| POO <sup>-</sup>                                       | 82 ± 1                            | 2.1 ± 0.3                                                       | 65 ± 23                                          | >240                                                             |

a. The surface tension measurements were fit with the Szyszkowski equation,  $\gamma = \gamma_0 - c_{\max}RT \ln(1 + K_L * c_{\text{bulk}})$  by allowing three parameters to float:  $\gamma_0$ ,  $c_{\max}$ , and  $K_L$ . Most fitted values of  $\gamma_0$  encompass the actual measured values within the listed error bars.

b. The solution temperature is 290 K if not specified.

c.  $\gamma_0$  represents the surface tension of the bare 5.1 M LiBr solution without surfactants. Different batches of 5.1 M LiBr/H<sub>2</sub>O solutions vary slightly ( $80 \pm 1.5$  mN/m) in the surface tensions due to non-identical sources of LiBr salts and surface-suctioning procedures. Each series of surfactant solutions in the surface tension measurements use bare LiBr/H<sub>2</sub>O solutions from the same batch, the surface tensions of which are repeatable within  $\pm 1$  mN/m from day-to-day tests.

d. The errors represent the fitting error of one standard deviation from a non-linear least squares fit carried out in Python using `scipy.optimize.curve_fit`.

e. Surfactant solubility was measured in 5.1 M LiBr/H<sub>2</sub>O at 290 K, unless otherwise specified. Solubility at 240 K is shown in brackets.

**Table S4. Comparison of surface tension fitting parameters with literature <sup>a</sup>**

| Surfactant solution                                    | $c_{\max}^b$ ( $1 \times 10^{14}$ / cm <sup>2</sup> ) in 5.1 M LiBr/H <sub>2</sub> O at 290 K | $c_{\max}^b$ ( $1 \times 10^{14}$ / cm <sup>2</sup> ) in pure H <sub>2</sub> O from literature | $K_L^b$ (M <sup>-1</sup> ) in 5.1 M LiBr/H <sub>2</sub> O at 290 K | $K_L^b$ (M <sup>-1</sup> ) in pure H <sub>2</sub> O from literature |
|--------------------------------------------------------|-----------------------------------------------------------------------------------------------|------------------------------------------------------------------------------------------------|--------------------------------------------------------------------|---------------------------------------------------------------------|
| <b>5.1 M LiBr/H<sub>2</sub>O + Neutral Surfactants</b> |                                                                                               |                                                                                                |                                                                    |                                                                     |
| BuOH                                                   | 3.4                                                                                           | 4.4 (298 K) <sup>7</sup>                                                                       | 99                                                                 | 12 (298 K) <sup>7</sup>                                             |
|                                                        |                                                                                               | 3.2 (293 K) <sup>8</sup>                                                                       |                                                                    | 23 (293 K) <sup>8</sup>                                             |
| PA                                                     | 3.5                                                                                           | 3.0 (293 K) <sup>9</sup>                                                                       | 350                                                                | 91 (293 K) <sup>9</sup>                                             |
| MeBuOH                                                 | 3.3                                                                                           | 3.9 (293 K) <sup>8</sup>                                                                       | 420                                                                | 58 (293 K) <sup>8</sup>                                             |
| POH                                                    | 3.9                                                                                           | 3.5 (293 K) <sup>10</sup>                                                                      | 300                                                                | 94 (293 K) <sup>10</sup>                                            |
|                                                        |                                                                                               | 4.2 (298 K) <sup>7</sup>                                                                       |                                                                    | 56 (298 K) <sup>7</sup>                                             |
| <b>5.1 M LiBr/H<sub>2</sub>O + Ionic Surfactants</b>   |                                                                                               |                                                                                                |                                                                    |                                                                     |
| HTMA <sup>+</sup>                                      | 1.3                                                                                           | 0.84 (298 K) <sup>11</sup>                                                                     | 440                                                                | 79 (298 K) <sup>11</sup>                                            |
|                                                        |                                                                                               | 0.96 (298 K) <sup>12</sup>                                                                     |                                                                    | 180 (298 K) <sup>12</sup>                                           |
| TBA <sup>+</sup>                                       | 1.1                                                                                           | 0.69 (298 K) <sup>13</sup>                                                                     | 16000                                                              | 72 (298 K) <sup>13</sup>                                            |
|                                                        |                                                                                               | 0.61 (298 K) <sup>14</sup>                                                                     |                                                                    | 190 (298 K) <sup>14</sup>                                           |
| BTMA <sup>+</sup>                                      | 2.8                                                                                           | 1.8 (303 K) <sup>15</sup>                                                                      | 37                                                                 |                                                                     |
|                                                        |                                                                                               | 2.5 (298 K) <sup>c 16</sup>                                                                    |                                                                    | 60 (298 K) <sup>c 16</sup>                                          |
| DTMA <sup>+</sup>                                      | 2.4                                                                                           | 1.5 (295 K) <sup>17</sup>                                                                      | 810000                                                             | 910 (295 K) <sup>17</sup>                                           |
|                                                        |                                                                                               | 1.7 (298 K) <sup>d 18</sup>                                                                    |                                                                    | 3200 (298 K) <sup>d 18</sup>                                        |

a. The surface tension measurements were fit with the Szyszkowski equation,  $\gamma = \gamma_0 - c_{\max}RT \ln(1 + K_L * c_{\text{bulk}})$  by allowing three parameters to float:  $\gamma_0$ ,  $c_{\max}$ , and  $K_L$ .

b. The data were fit using the non-linear least squares method carried out in Python using `scipy.optimize.curve_fit`.

c. Surface tension data was measured in 6.7 M LiBr/H<sub>2</sub>O.

d. Surface tension data was measured in 0.1 M NaBr/H<sub>2</sub>O

**Table S5.** Surfactant Packing Properties at Experimental Bulk Concentrations

| Surfactant solution <sup>a</sup>                       | Surfactant surface concentration ( $c_{\text{surf}}$ ) <sup>b</sup><br>( $1 \times 10^{14}$ / $\text{cm}^2$ ) | Limiting molecular <sup>c</sup><br>area $A_{\text{min}}$ ( $\text{\AA}^2$ ) | Surface coverage $\theta$<br>$= c_{\text{surf}}/c_{\text{pack}}$ <sup>c</sup><br>(from 0 to 1) <sup>d</sup> |
|--------------------------------------------------------|---------------------------------------------------------------------------------------------------------------|-----------------------------------------------------------------------------|-------------------------------------------------------------------------------------------------------------|
| <b>5.1 M LiBr/H<sub>2</sub>O + Neutral Surfactants</b> |                                                                                                               |                                                                             |                                                                                                             |
| 60 mM BuOH                                             | $2.9 \pm 0.3$                                                                                                 | 19 <sup>19</sup>                                                            | $0.55 \pm 0.06$                                                                                             |
| 60mM MeBuOH                                            | $3.1 \pm 0.1$                                                                                                 | 24 <sup>20</sup>                                                            | $0.74 \pm 0.02$                                                                                             |
| 60 mM POH                                              | $3.7 \pm 0.2$                                                                                                 | 19 = BuOH                                                                   | $0.70 \pm 0.03$                                                                                             |
| 80 mM PA                                               | $3.4 \pm 0.2$                                                                                                 | 22 <sup>21</sup>                                                            | $0.75 \pm 0.04$                                                                                             |
| 80 mM PA (273 K)                                       | $2.8 \pm 0.2$                                                                                                 | 22 <sup>21</sup>                                                            | $0.62 \pm 0.04$                                                                                             |
| <b>5.1 M LiBr/H<sub>2</sub>O + Ionic Surfactants</b>   |                                                                                                               |                                                                             |                                                                                                             |
| 100 mM HTMA <sup>+</sup>                               | $1.3 \pm 0.1$                                                                                                 | 32 <sup>22</sup>                                                            | $0.42 \pm 0.03$                                                                                             |
| 50 mM TBA <sup>+</sup>                                 | $1.1 \pm 0.03$                                                                                                | 50 <sup>22</sup>                                                            | $0.55 \pm 0.02$                                                                                             |
| 150 mM TBA <sup>+</sup>                                | $1.1 \pm 0.03$                                                                                                | 50 <sup>22</sup>                                                            | $0.55 \pm 0.02$                                                                                             |
| 50 mM TBA <sup>+</sup> (273 K)                         | $1.0 \pm 0.07$                                                                                                | 50 <sup>22</sup>                                                            | $0.50 \pm 0.04$                                                                                             |
| 150 mM TBA <sup>+</sup> (273 K)                        | $1.0 \pm 0.07$                                                                                                | 50 <sup>22</sup>                                                            | $0.50 \pm 0.04$                                                                                             |
| 250 mM BTMA <sup>+</sup>                               | $2.5 \pm 0.3$                                                                                                 | 32 = HTMA <sup>+</sup>                                                      | $0.80 \pm 0.08$                                                                                             |
| 100 mM DTMA <sup>+</sup>                               | $2.4 \pm 0.3$                                                                                                 | 32 = HTMA <sup>+</sup>                                                      | $0.77 \pm 0.08$                                                                                             |
| 74 mM POO <sup>-</sup>                                 | $1.7 \pm 0.3$                                                                                                 | 22 = PA                                                                     | $0.37 \pm 0.06$                                                                                             |

a. The liquid temperature is 290 K if not specified.

b. The uncertainty in the surface concentration ( $\Delta c_{\text{surf}}$ ) is calculated from error propagation:  $\Delta c_{\text{surf}} = \partial c_{\text{surf}}/\partial c_{\text{max}} * \Delta c_{\text{max}} + \partial c_{\text{surf}}/\partial K_L * \Delta K_L + \partial c_{\text{surf}}/\partial c_{\text{bulk}} * \Delta c_{\text{bulk}}$ , where  $\Delta c_{\text{max}}$ ,  $\Delta K_L$ , and  $\Delta c_{\text{bulk}}$  are uncertainties in  $c_{\text{max}}$ ,  $K_L$  and  $c_{\text{bulk}}$ . The uncertainties  $\Delta c_{\text{max}}$  and  $\Delta K_L$  are obtained from a least-squares fit of the Szyszkowski equation, while  $\Delta c_{\text{bulk}}$  is the error of surfactant bulk concentration in making solutions.

c. The minimum areas are not derived from the fitted values of  $c_{\text{max}}$ , but rather taken from the specified literature as the smallest measured area. The maximum packing density  $c_{\text{pack}} = 1/A_{\text{min}}$ .

d. The uncertainty in the surface coverage ( $\Delta \theta$ ) is calculated from  $\Delta \theta = d\theta/dc_{\text{surf}} * \Delta c_{\text{surf}}$ .



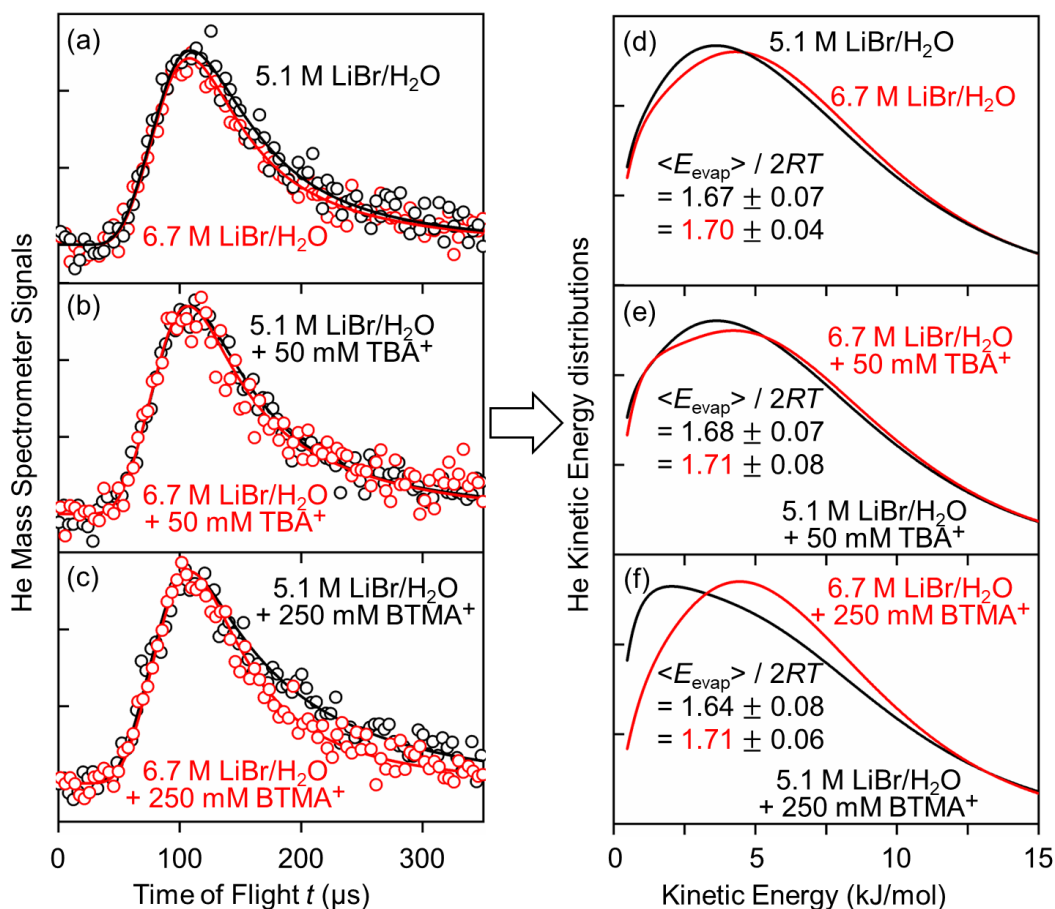

**Fig. S2** Time-of-flight spectra (left) and flux-weighted energy distributions (right) of helium atoms evaporating from 5.1 M (6.0 molal) LiBr/H<sub>2</sub>O (black) and 6.7 M (8.0 molal) LiBr/H<sub>2</sub>O (red) solutions without surfactants (a, d), with 50 mM TBA<sup>+</sup> (b, e), and with 250 mM BTMA<sup>+</sup> (c, f) at 235 K. The labels are: TBA<sup>+</sup> = tetrabutylammonium, and BTMA<sup>+</sup> = benzyltrimethylammonium.  $\langle E_{\text{evap}} \rangle / 2RT$  represents the flux-weighted kinetic energy of evaporating He atoms with respect to  $2RT$ , the analogous average energy for a Maxwell-Boltzmann distribution.

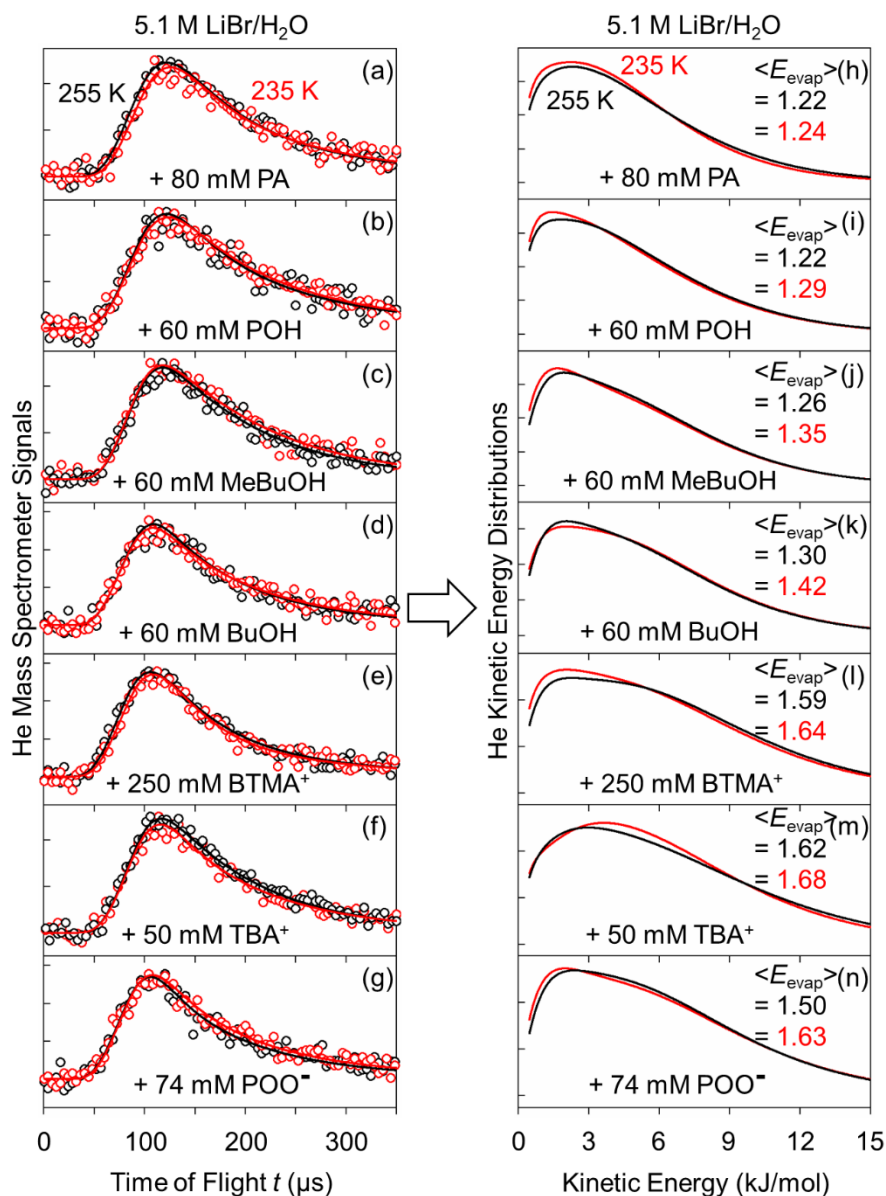

**Fig. S3** Time-of-flight spectra (left) and flux-weighted energy distributions (right) of helium atoms evaporating from 5.1 M LiBr/H<sub>2</sub>O solutions with added surfactants. Black = 255 K and Red = 235 K. The labels are: PA = pentanoic acid, POH = pentanol, MeBuOH = 3-methyl-1-butanol, BTMA<sup>+</sup> = benzyltrimethylammonium, and TBA<sup>+</sup> = tetrabutylammonium.  $\langle E_{\text{evap}} \rangle$  represents flux-weighted kinetic energy of evaporating He atoms with respect to  $2 RT$ . The error bars of  $\langle E_{\text{evap}} \rangle / 2RT$  vary from  $\pm 0.07$  to  $\pm 0.08$ . Note that the ratios at 255 and 235 K are very similar but systematically higher at lower temperature. This trend has been observed previously in surfactant-free salty water solutions in ref. 23.

## Surfactant Adsorption in a Microjet: Helium Evaporation and SF<sub>6</sub> Scattering

We first address the question of how we chose surfactant concentrations for the experiments. The maximum solubilities of the surfactants are listed in the last column of Table S3 (page S5) in comparison with the chosen bulk concentrations in the first column. Pentanol and pentanoic acid are the longest neutral alcohols and carboxylic acids that have > 50 mM solubilities in cold LiBr/H<sub>2</sub>O (hexanol solubility is only 12 mM). These concentrations are required for diffusion to significantly populate the surface. The ionic surfactants are more soluble and higher bulk concentrations were selected.

We next discuss the diffusion and adsorption of surfactants to the surface of the fast-flowing microjet. The jet travels a distance of 1.0 mm from the nozzle tip to the center of the observation region in times  $t = 42 \mu\text{s}$  at 255 K and  $63 \mu\text{s}$  at 235 K. They are equal to the time for the surfactant to diffuse from the bulk to the surface and coat the LiBr/H<sub>2</sub>O solution. These short times may be insufficient for the surfactants to fully coat the surface of the jet. In particular, as surfactant molecules populate the surface region, some diffuse back into solution and some diffuse to the surface but do not stick because the surface site is already filled.<sup>6</sup> These processes slow down the formation of a complete, equilibrium monolayer. Such considerations are particularly important for the ionic surfactants in this study because their high values of  $\langle E_{\text{evap}} \rangle / 2RT$  might be interpreted to mean that the surfactants did not have sufficient time to segregate to the surface of the microjet.

Numerical methods may be used to estimate the filling time of a monolayer that depend on the surfactant diffusion coefficient and Langmuir constants.<sup>6</sup> These methods depend on the product  $(Dt)^{1/2}$ , where  $D$  is the surfactant diffusion coefficient. For pentanol,  $D$  is  $1 \times 10^{-6}$  and

$0.4 \times 10^{-6} \text{ cm}^2/\text{s}$  at 255 and 235 K in 6.0 molal LiBr/H<sub>2</sub>O, while for TBA<sup>+</sup>,  $D$  is 60% of these values.<sup>24</sup>

In each case,  $D$  is estimated from the value in pure water at 298 K and the Stokes-Einstein equation,  $D_2/D_1 = (T_2 \eta_1)/(T_1 \eta_2)$ .  $(Dt)^{1/2}$  is roughly the depth over which the surfactant must diffuse to populate the surface, equal to approximately 700 Å at 255 K and 500 Å at 235 K.

We chose not to model segregation because of a lack of surface tension information at 255 or 235 K. Instead, we investigate experimentally the effects of temperature, surfactant concentration, and aging time under actual operating conditions. Fig. S3 (previous page) compares helium evaporation at 255 and 235 K, where the ratio of  $(Dt)^{1/2}$  at 255/235 K is 1.4. The values of  $\langle E_{\text{evap}} \rangle / 2RT$  are up to 11% larger at 235 K than 255 K, which is the same trend observed for helium evaporating from bare LiBr/H<sub>2</sub>O.<sup>23</sup> The different diffusion depths do not seem to affect  $\langle E_{\text{evap}} \rangle / 2RT$  in an unexpected way, suggesting that the monolayers are fairly well populated at 255 and 235 K.

A more sensitive test can be gleaned from Fig. S4. These panels compare He evaporation from TBA<sup>+</sup> at 255 K at (a) 50 mM and (b) 150 mM bulk concentration, and (c) for a 3.5-fold longer aging time at 150 mM. The values of  $\langle E_{\text{evap}} \rangle / 2RT$  drop 9% from 1.62 to 1.52 to 1.47. This decrease may be correlated with higher surfactant concentrations (see Fig. 8b in the main text). The trend in Fig. S4 implies that TBA<sup>+</sup> populates the surface more densely when the bulk concentration is higher and the aging time is longer, and thus that TBA<sup>+</sup> segregation is not quite complete at the shortest time. Still,  $\langle E_{\text{evap}} \rangle / 2RT$  changes by only 9% and is not close to the 1.19 value for decane.

Lastly, we used high energy SF<sub>6</sub> scattering to determine the presence of one surfactant, TBA<sup>+</sup>, at the surface of the microjet and its change in monolayer population with bulk

concentration and aging time. We found previously that the impulsive energy loss of SF<sub>6</sub> molecules upon collision with a liquid depends sensitively on the mass of the surface species when one species is heavy and compact, such as TBA<sup>+</sup>.<sup>25</sup> Trends in this energy loss also track changes in equilibrium surface concentrations, as measured by surface tension at room temperature. We therefore use SF<sub>6</sub> scattering here to infer changes in surface segregation.

Fig. S5 compares 300 kJ/mol SF<sub>6</sub> scattering at different TBA<sup>+</sup> concentrations and different distances,  $d$ , between the nozzle tip and the center of the observation region. This distance is proportional to the aging time.

Panel a contrasts the recoil of SF<sub>6</sub> from bare 5.1 M LiBr/H<sub>2</sub>O and a solution containing 50 mM TBABr at 255 K. The scattering is performed at  $d = 5.3$  mm in order to avoid collisions of SF<sub>6</sub> with the tip of the glass nozzle. The SF<sub>6</sub> spectrum shows a distinct peak at short arrival times (high speeds) when TBA<sup>+</sup> is added to solution. This peak corresponds to high recoil energies as the SF<sub>6</sub> molecules scatter from the heavy TBA<sup>+</sup> ions, reflecting their presence in the interfacial region. Panel (b) compares measurements of SF<sub>6</sub> scattering from 50 mM TBA<sup>+</sup> at  $d = 4.3$  and 5.3 mm. The nearly identical spectra show that an increase in aging time from 140 to 220  $\mu$ s does not alter the surface concentration of TBA<sup>+</sup>. Moreover, the 50 mM TBA<sup>+</sup> solution at  $d = 4.3$  mm was shown in ref. 25 to create an equilibrium TBA<sup>+</sup> film. Panel c shows SF<sub>6</sub> scattering from a solution of 150 mM TBA<sup>+</sup> and at the same distance  $d = 3.5$  mm used in the helium evaporation spectrum in Fig S4(c). The overlap with the 50 mM solution in panel b indicates that the surface of this solution is also saturated with TBA<sup>+</sup> at its equilibrium value. Thus, we infer that the maximum overshoot of  $\langle E_{\text{evap}} \rangle / 2RT$  is the 9% value for 50 mM TBA<sup>+</sup> quoted above, which is likely similar for the other ionic surfactants at bulk concentrations greater than 50 mM, as used in this study.

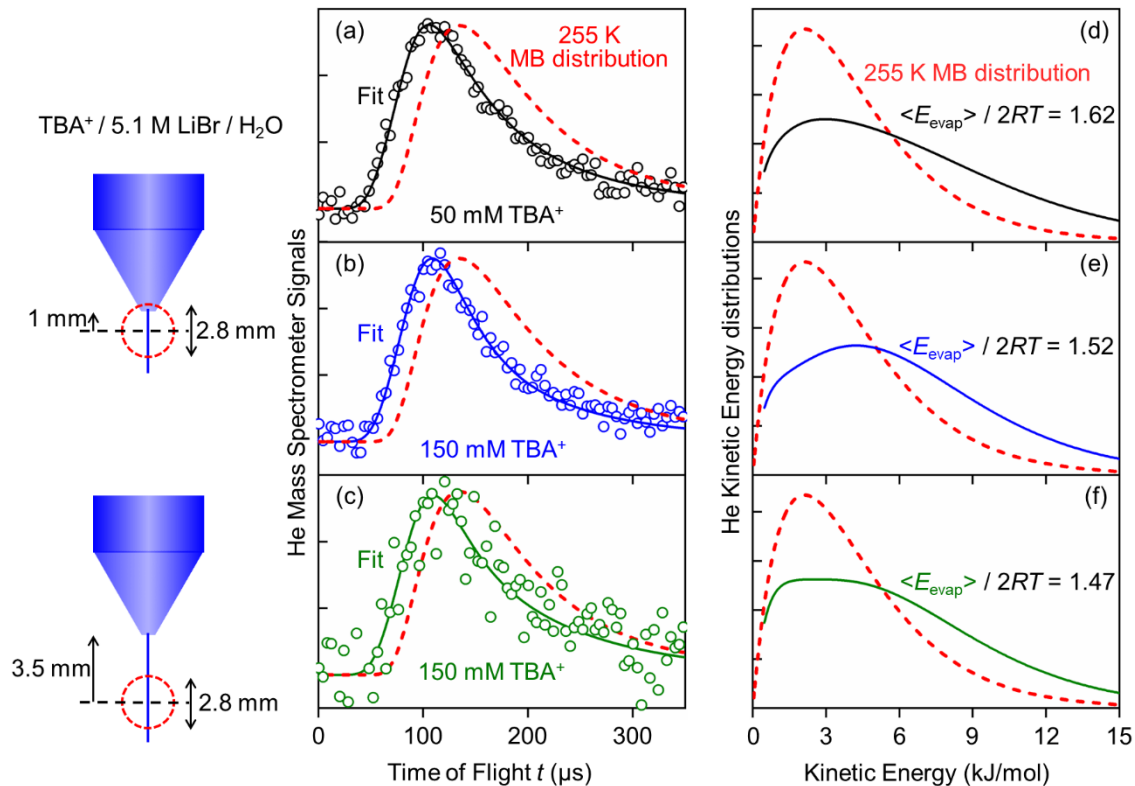

**Fig. S4** Time-of-flight spectra (left) and flux-weighted energy distributions (right) of helium atoms evaporating from 5.1 M LiBr/H<sub>2</sub>O solutions containing tetrabutylammonium (TBA<sup>+</sup>). The TBA<sup>+</sup> bulk concentrations and the distances between the nozzle tip and the center of the viewing region are (a, d) 50 mM and  $\sim 1$  mm, (b, e) 150 mM and  $\sim 1$  mm, and (c, f) 150 mM and  $\sim 3.5$  mm. The viewing region of the detector (dashed circles) is 2.8 mm in diameter.  $\langle E_{\text{evap}} \rangle / 2RT$  represents flux-weighted kinetic energy of evaporating He atoms with respect to  $2 RT$ . The error bars for  $\langle E_{\text{evap}} \rangle / 2RT$  are  $\pm 0.07$  (d),  $\pm 0.07$  (e), and  $\pm 0.08$  (f). The signal is weaker in panel (c) because helium is highly insoluble in salty water and is rapidly depleted from the near surface region when the jet is exposed to vacuum.

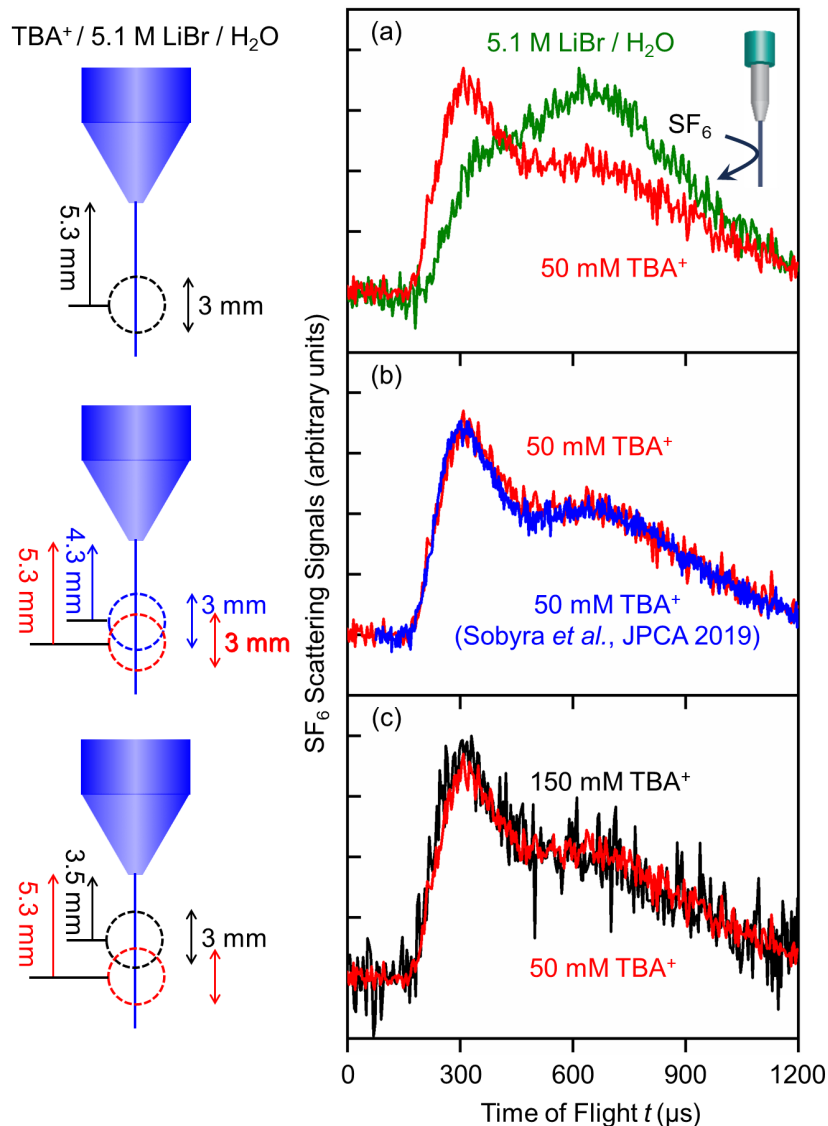

**Fig. S5** Time-of-flight spectra of  $\text{SF}_6$  scattering from 5.1 M  $\text{LiBr}/\text{H}_2\text{O}$  without and with tetrabutylammonium ( $\text{TBA}^+$ ) at different concentrations and aging times. The incident translational energy of the  $\text{SF}_6$  molecules is close to 300 kJ/mol.  $d$  = distance between the nozzle tip and the center of the observation region. (a) comparison of bare and added 50 mM  $\text{TBA}^+$  at  $d = 5.3$  mm between nozzle and observation region, (b) comparison of 50 mM  $\text{TBA}^+$  at  $d = 4.3$  and 5.3 mm, (c) comparison of 50 mM  $\text{TBA}^+$  at  $d = 5.3$  mm and 150 mM  $\text{TBA}^+$  at  $d = 3.5$  mm. The aging times are 150, 140, and 220  $\mu\text{s}$  for  $d = 3.5, 4.3,$  and  $5.3$  mm. The blue curve is adapted from ref. 25 in which the jet speed is 30 - 32 m/s, higher than 24 m/s in the current experiments.

## References

1. J. A. Faust and G. M. Nathanson, *Chem. Soc. Rev.*, 2016, **45**, 3609-3620.
2. X. F. Gao and G. M. Nathanson, *Acc. Chem. Res.*, 2022, **55**, 3294-3302.
3. V. P. Mashovets, N. M. Baron and M. U. Shcherba, *Zh. Prikl. Khim.*, 1971, **44**, 1981-1986.
4. D. R. Caudwell, J. M. Trusler, V. Vesovic and W. A. Wakeham, *J. Chem. Eng. Data*, 2009, **54**, 359-366.
5. G. T. Barnes, *Colloid Surf. A-Physicochem. Eng. Asp.*, 1997, **126**, 149-158.
6. C. H. Chang and E. I. Franses, *Colloid Surf. A-Physicochem. Eng. Asp.*, 1995, **100**, 1-45.
7. K. K. Cheng and C. Park, *Heat Mass Transf.*, 2017, **53**, 2255-2263.
8. C. C. Addison, *J. Chem. Soc.*, 1945, 98-106.
9. F. Suárez and C. M. Romero, *J. Chem. Eng. Data*, 2011, **56**, 1778-1786.
10. C. M. Romero, E. Jiménez and F. Suárez, *J. Chem. Thermodyn.*, 2009, **41**, 513-516.
11. D. Gómez-Díaz, J. M. Navaza and B. Sanjurjo, *J. Chem. Eng. Data*, 2007, **52**, 889-891.
12. J. C. Sanabria and C. M. Romero, *J. Mol. Liq.*, 2022, **366**, 120283.
13. K. Tamaki, *Bull. Chem. Soc. Jpn.*, 1974, **47**, 2764-2767.
14. H. Akiba and R. Ohmura, *J. Chem. Thermodyn.*, 2016, **92**, 72-75.
15. Y. H. Gao, J. L. Chai, J. Xu, G. Z. Li and G. Y. Zhang, *J. Dispersion Sci. Technol.*, 2006, **27**, 1059-1063.
16. X. F. Gao, D. J. Hood, X. Y. Zhao and G. M. Nathanson, *J. Am. Chem. Soc.*, 2023, **145**, 10987-10990.
17. C. Kotsmar, E. V. Aksenenko, V. B. Fainerman, V. Pradines, J. Krägel and R. Miller, *Colloid Surf. A-Physicochem. Eng. Asp.*, 2010, **354**, 210-217.



18. P. X. Li, R. K. Thomas and J. Penfold, *Langmuir*, 2014, **30**, 6739-6747.
19. L. M. Cosman and A. K. Bertram, *J. Phys. Chem. A*, 2008, **112**, 4625-4635.
20. D. Vollhardt, G. Emrich, S. Siegel and R. Rudert, *Langmuir*, 2002, **18**, 6571-6577.
21. K. Lunkenheimer, W. Barzyk, R. Hirte and R. Rudert, *Langmuir*, 2003, **19**, 6140-6150.
22. G. Para, A. Hamerska-Dudra, K. A. Wilk and P. Warszynski, *Colloid Surf. A-Physicochem. Eng. Asp.*, 2010, **365**, 215-221.
23. C. Hahn, Z. R. Kann, J. A. Faust, J. L. Skinner and G. M. Nathanson, *J. Chem. Phys.*, 2016, **144**.
24. W. M. Haynes, in *CRC Handbook of Chemistry and Physics, Section 5: Ionic conductivity and diffusion at infinite dilution*, ed. J. R. Rumble, CRC press, 104 edn., 2014, ch. 9, pp. 77-79.
25. T. B. Sobyra, H. Pliszka, T. H. Bertram and G. M. Nathanson, *J. Phys. Chem. A*, 2019, **123**, 8942-8953.
